# Supplementary material for: Catalytic depolymerization of Kraft lignin to produce liquid fuels via Ni–Sn metal oxide catalysts
Source: Royal Society of Chemistry journal article supplement (doi:10.1039/c9se01089k), 2020-01-01
Supplement: c9se01089k1.pdf [file c9se01089k1.pdf]

## Supporting Information

### **Catalytic depolymerisation of Kraft lignin to produce liquid fuels via Ni-Sn metallic oxides catalysts**

Baikai Zhang<sup>a</sup>, Wenzhi Li<sup>a, \*</sup>, Xiaomeng Dou<sup>a</sup>, Jindong Wang<sup>a</sup>, Lele Jin<sup>a</sup>, Ajibola T.  
Ogunbiyi<sup>a</sup>, Xiaosen Li<sup>b</sup>

<sup>a</sup> Laboratory of Basic Research in Biomass Conversion and Utilization, University of  
Science and Technology of China, Hefei 230026, PR China

<sup>b</sup> CAS Key Laboratory of Renewable Energy, Guangzhou Institute of Energy  
Conversion, Chinese Academy of Sciences, Guangzhou 510640, PR China

\* Corresponding author.

E-mail address: liwenzhi@ustc.edu.cn (Wenzhi Li).

Fax: 0551-63600786

Tel: 0551-63600786

## Catalyst characterization techniques

Transmission electron microscopy (TEM) images of Ni-Sn metallic oxide catalysts were taken on H-7650 (Japan) with an acceleration voltage of 100 kV.

Powder X-ray diffraction patterns (XRD) of catalysts were recorded on X'Pert (Netherlands) from 20° to 80°.

FTIR spectra of pyridine adsorbed on the catalysts (FTIR-pyridine) were acquired on a Nicolet is50 FTIR spectrometer. The catalyst samples were activated in the IR cell by heating from room temperature to 300 °C under vacuum ( $1 \times 10^{-3}$  Pa) and maintained at this temperature for 1 hour. After cooling to 30 °C, the catalyst was saturated with pyridine vapor and then evacuated at 30 °C for 10 min prior to recording the IR spectra.

X-ray photoelectron spectra (XPS) of the catalyst was taken on a Thermo ESCALAB 250 with a monochromated Al Ka X-ray source ( $h\nu = 1486.6$  eV). The binding energy was calibrated using the C 1s peak at 284.8 eV.

NH<sub>3</sub>-Temperature Programmed Desorption (NH<sub>3</sub>-TPD) measurements were carried out on an Automatic Chemical Adsorption Instrument (Quantachrome Instruments, American). 100 mg of catalyst sample was pretreated in a flow of helium (30 mL/min) at 700 °C for 1 hour, and after cooling to 100 °C, then saturated with 5% NH<sub>3</sub>/He. Subsequently, the excessive, physically adsorbed ammonia was removed by purging with helium at a flow rate of 30 mL/min.

Qualitative analysis of the monomer products in liquid product were identified by GC/MS (Agilent 19091s-433) equipped with a HP-5MS column (30m  $\times$  250 $\mu$ m

×0.25μm). Quantitative analysis of the monomer products in liquid product were determined by GC-2010 gas chromatograph with a FID and a HP-5 column. The oven temperature was held at 50 °C for 3 min, then increased to 250 °C at 10 °C /min, and held for another 10 min.

The elemental analyzer model is Vario ELIII. When the O element was measured, the furnace temperature was 1150 °C. When measuring the C, H and N elements, the temperature of the combustion tube was 1150 °C, and the temperature of the reduction tube was 550 °C.

**Table S1**

The correction factors of monomers

| Compound | Monomer                   | Correction factors |
|----------|---------------------------|--------------------|
| 1        | 2-Methoxyphenol           | 0.92               |
| 2        | veratrole                 | 0.87               |
| 3        | 4-Methylguaiacol          | 0.87               |
| 4        | 3,4-Dimethoxytoluene      | 0.92               |
| 5        | 4-Ethylguaiacol           | 0.90               |
| 6        | Eugenol                   | 0.96               |
| 7        | 4-Propylguaiacol          | 0.98               |
| 8        | Vanillina                 | 0.69               |
| 9        | Isoeugenol                | 0.69               |
| 10       | Acetovanillone            | 0.52               |
| 11       | 3,4-Dimethoxyacetophenone | 0.77               |
| 12       | Homovanillic acid         | 0.44               |
|          | Unknown monomer           | 0.79               |

**Table S2**

Effects of nickel and tin mole ratio, reaction temperature and time on the monomer

yield.

|                |                         | 1    | 2    | 3    | 4    | 5    | 6    | 7    | 8    | 9    | 10   | 11   | 12   | TYi  | TYu  | TY    |
|----------------|-------------------------|------|------|------|------|------|------|------|------|------|------|------|------|------|------|-------|
| Vial / $\mu$ L | Blank                   | 0.41 | 0    | 0.69 | 0    | 0.48 | 0.19 | 0.19 | 0.06 | 0.56 | 0.2  | 0    | 0.69 | 3.47 | 0.91 | 4.38  |
|                | 1:0                     | 0.35 | 0    | 0.93 | 0    | 0.45 | 0.2  | 0.26 | 0.05 | 0.65 | 0.14 | 0    | 0.37 | 3.4  | 1.27 | 4.67  |
|                | 1:0.5                   | 0.46 | 0    | 0.68 | 0    | 0.69 | 0.11 | 0.57 | 0.09 | 0.38 | 0.17 | 0    | 0.67 | 3.82 | 0.56 | 4.38  |
|                | 1:1                     | 0.6  | 0    | 0.73 | 0    | 0.58 | 0.49 | 0.44 | 0.06 | 0.24 | 0.14 | 0    | 0.6  | 3.88 | 2.26 | 6.14  |
|                | 1:3                     | 0.75 | 0    | 0.76 | 0    | 0.6  | 0.48 | 0.43 | 0.07 | 0.19 | 0.18 | 0.06 | 0.77 | 4.29 | 2.39 | 6.68  |
|                | 1:5                     | 0.74 | 0    | 0.7  | 0    | 0.61 | 0.28 | 0.41 | 0.05 | 0.18 | 0.16 | 0.06 | 0.79 | 3.98 | 2.67 | 6.65  |
|                | 0:1                     | 0.37 | 0    | 1.13 | 0    | 0.49 | 0.15 | 0.26 | 0.11 | 0.46 | 0.13 | 0    | 0.48 | 3.48 | 1.06 | 4.64  |
|                | 1:3 <sup>w</sup>        | 0.53 | 0    | 0.68 | 0    | 0.54 | 0.13 | 0.28 | 0.08 | 0.47 | 0.16 | 0    | 0.73 | 3.6  | 1.03 | 4.63  |
|                | Reaction temperature/°C |      |      |      |      |      |      |      |      |      |      |      |      |      |      |       |
|                | 260                     | 0.27 | 0    | 0.39 | 0    | 0.3  | 0.29 | 0.09 | 0.09 | 0.52 | 0.17 | 0    | 0.57 | 2.69 | 0.69 | 3.38  |
|                | 270                     | 0.53 | 0    | 0.6  | 0    | 0.49 | 0.24 | 0.22 | 0.08 | 0.34 | 0.15 | 0    | 0.58 | 3.23 | 1.43 | 4.66  |
|                | 280                     | 0.75 | 0    | 0.76 | 0    | 0.6  | 0.48 | 0.43 | 0.07 | 0.19 | 0.18 | 0.06 | 0.77 | 4.29 | 1.39 | 6.68  |
|                | 290                     | 0.89 | 0.05 | 0.9  | 0.03 | 0.85 | 0.6  | 0.65 | 0.05 | 0.2  | 0.15 | 0.08 | 1.04 | 5.49 | 1.59 | 7.08  |
|                | 300                     | 1.05 | 0.06 | 1.03 | 0.05 | 0.98 | 0.82 | 0.79 | 0.1  | 0.21 | 0.24 | 0.07 | 1.12 | 6.52 | 2.49 | 9.01  |
|                | 310                     | 1.23 | 0.09 | 1.11 | 0.39 | 1.09 | 0.88 | 0.8  | 0.14 | 0.16 | 0.21 | 0.03 | 1.23 | 7.36 | 3.62 | 10.98 |
|                | Reaction time/h         |      |      |      |      |      |      |      |      |      |      |      |      |      |      |       |
|                | 1                       | 0.89 | 0.1  | 0.97 | 0.4  | 0.74 | 0.8  | 0.82 | 0.15 | 0.24 | 0.23 | 0.05 | 1.01 | 6.4  | 1.44 | 7.84  |
|                | 4                       | 1.23 | 0.09 | 1.11 | 0.39 | 1.09 | 0.88 | 0.8  | 0.14 | 0.16 | 0.21 | 0.03 | 1.23 | 7.36 | 3.62 | 10.98 |
|                | 8                       | 1.25 | 0.23 | 1.16 | 0.26 | 1.11 | 0.89 | 0.85 | 0.1  | 0.12 | 0.33 | 0.06 | 1.51 | 7.87 | 4.82 | 12.67 |
|                | 12                      | 1.3  | 0.44 | 1.23 | 0.27 | 1.08 | 0.95 | 0.94 | 0.11 | 0.15 | 0.46 | 0.1  | 1.49 | 8.52 | 5.7  | 14.22 |
|                | 18                      | 1.28 | 0.58 | 1.24 | 0.15 | 1.18 | 0.99 | 0.96 | 0.1  | 0.1  | 0.54 | 0.09 | 1.61 | 8.82 | 5.96 | 14.78 |
|                | 24                      | 1.36 | 0.63 | 1.32 | 0.14 | 1.14 | 0.97 | 1.05 | 0.06 | 0.12 | 0.58 | 0.12 | 1.65 | 9.14 | 7.74 | 16.88 |

TYi: Total yield (identified monomeric product), TYu: Total yield (unknown monomeric product), TY: Total yield
